# Supplementary material for: Seroprevalence of IgG Antibodies Directed against Dengue, Chikungunya and West Nile Viruses and Associated Risk Factors in Madagascar, 2011 to 2013
Source: MDPI journal article supplement (doi:10.3390/v15081707), 2023-08-08
Supplement: s1 [file s1]

**Supplementary Figure S1.** Spatial distribution of seropositivity for the different DENV serotypes. (A) DENV1 serotype (B) DENV2 serotype (C) DENV3 serotype (D) DENV4 serotype.

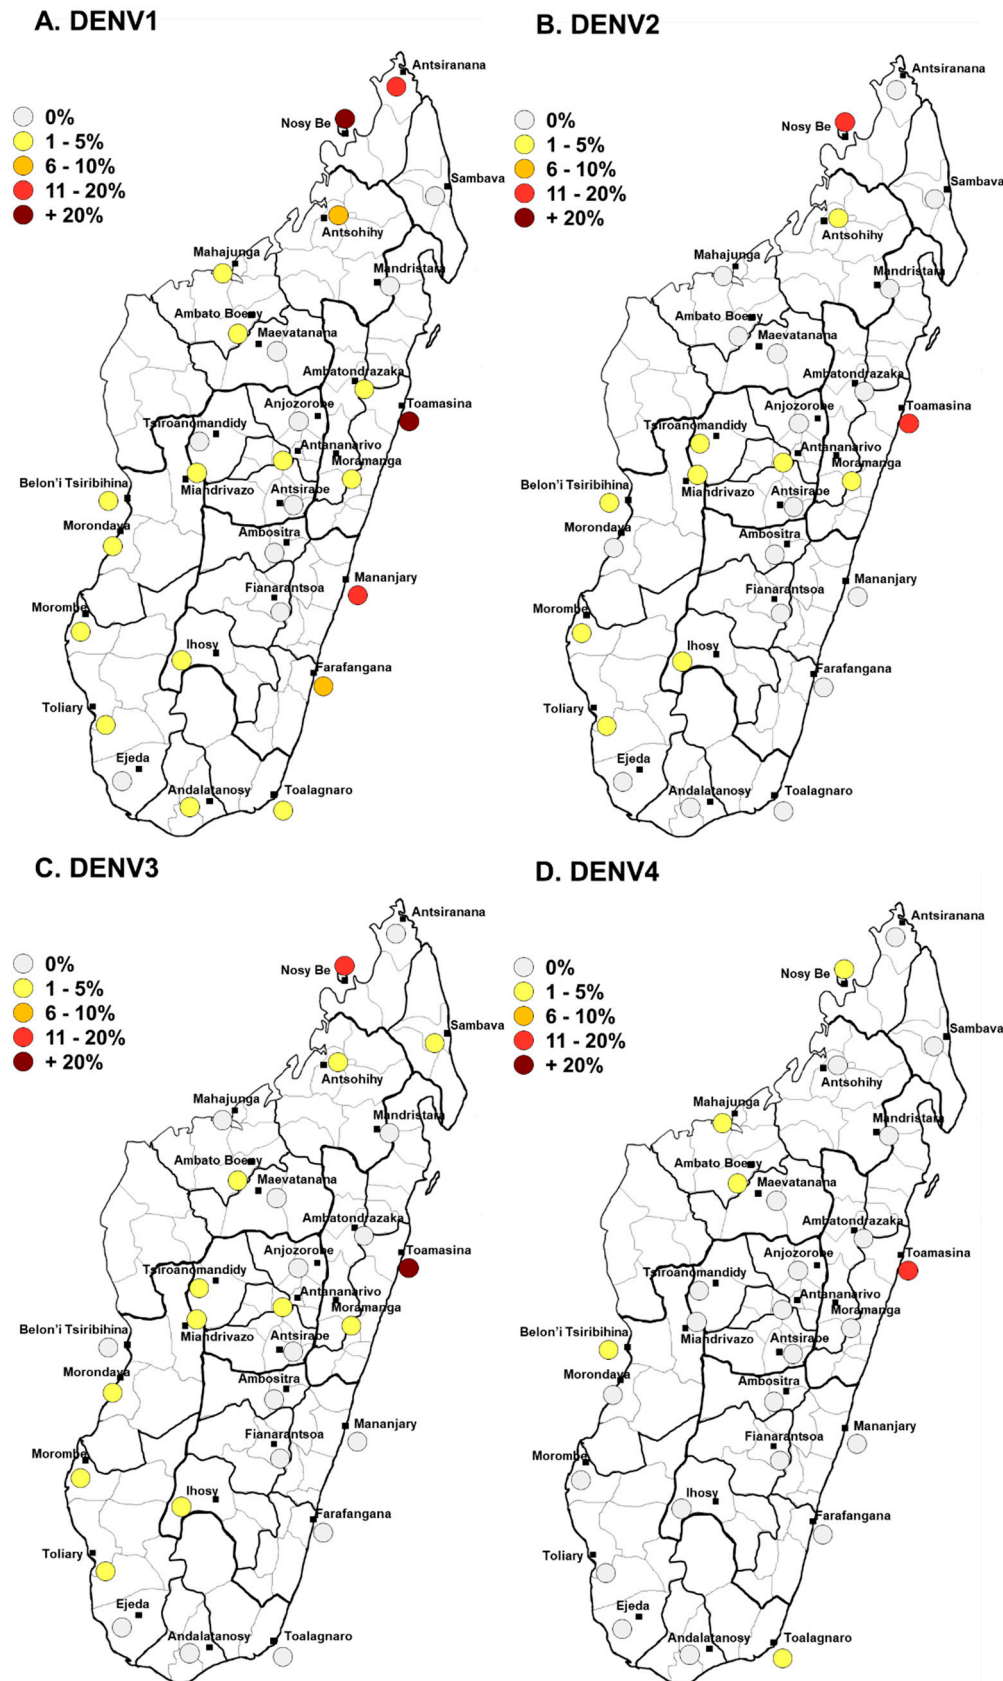

# Supplementary Table S1. Univariate analysis results for Dengue virus seropositivity.

Logistic regression analysis was run using xtlogit command and variables with p-value less than or equal to 0.2 (in bold) were selected for multivariate analysis. Variable “General environment” was used in multivariate models over “Distance to SHC” as it was deemed to be more representative of the direct environment. Due to possible confusion bias and incoherent results, “Frequent use of bed net” variable was excluded from multivariate models.

| Tested variable                   | N tested <sup>1</sup> | Nb pos (%) | IC pos   | OR   | IC95% OR  | p-value |
|-----------------------------------|-----------------------|------------|----------|------|-----------|---------|
| Age category                      |                       |            |          |      |           |         |
| 18-24 years                       | 388                   | 26 (6.7)   | 3.5-9.9  | 1    |           | 1.000   |
| 25-34 years                       | 434                   | 28 (6.5)   | 3.6-9.3  | 0.99 | 0.52-1.87 |         |
| 35-44 years                       | 360                   | 23 (6.4)   | 3.1-9.6  | 1.0  | 0.51-1.96 |         |
| ≥45 years                         | 498                   | 33 (6.6)   | 4.0-9.3  | 0.99 | 0.53-1.85 |         |
| Sex                               |                       |            |          |      |           |         |
| Male                              | 829                   | 51 (6.2)   | 4.3-8.0  | 1    |           | 0.4188  |
| Female                            | 851                   | 59 (6.9)   | 4.4-9.5  | 1.20 | 0.77-1.88 |         |
| Distance from SHC                 |                       |            |          |      |           |         |
| Close to SHC                      | 840                   | 45 (5.4)   | 3.1-7.6  | 1    |           | 0.2168  |
| Distant from SHC                  | 840                   | 65 (7.7)   | 4.5-10.9 | 1.58 | 0.76-3.25 |         |
| General environment               |                       |            |          |      |           |         |
| Rural                             | 714                   | 61 (8.5)   | 4.9-12.2 | 1    |           | 0.2669  |
| Urban                             | 516                   | 28 (5.4)   | 2.3-8.6  | 0.54 | 0.23-1.24 |         |
| Peri-urban                        | 450                   | 21 (4.7)   | 2.5-6.9  | 0.58 | 0.25-1.35 |         |
| MFA Factor 1                      | 1 680                 |            |          | 1.17 | 0.86-1.61 | 0.3209  |
| MFA Factor 2                      | 1 680                 |            |          | 1.87 | 1.36-2.59 | 0.0001  |
| MFA Factor 3                      | 1 680                 |            |          | 1.17 | 0.77-1.77 | 0.4589  |
| MFA Factor 4                      | 1 680                 |            |          | 2.19 | 1.45-3.30 | 0.0002  |
| Education level                   |                       |            |          |      |           |         |
| Never been to school              | 214                   | 14 (6.7)   | 3.1-10.2 | 1    |           | 0.5911  |
| Primary school level              | 626                   | 47 (7.5)   | 4.8-10.2 | 1.16 | 0.56-2.40 |         |
| Secondary school                  | 500                   | 34 (6.8)   | 4.1-9.5  | 1.12 | 0.51-2.45 |         |
| High school                       | 260                   | 12 (4.6)   | 1.9-7.3  | 0.77 | 29.6-1.99 |         |
| University                        | 80                    | 3 (3.8)    | 0.0-7.9  | 0.44 | 0.10-0.52 |         |
| Outdoor profession                |                       |            |          |      |           |         |
| No                                | 756                   | 48 (6.3)   | 3.8-8.9  | 1    |           | 0.6462  |
| Yes                               | 924                   | 62 (6.7)   | 4.3-9.1  | 1.13 | 0.67-1.93 |         |
| Smoker                            |                       |            |          |      |           |         |
| No                                | 1 336                 | 93         |          | 1    |           | 0.0185  |
| Yes                               | 344                   | 17         |          | 0.47 | 0.25-0.88 |         |
| Frequent use of bed nets          |                       |            |          |      |           |         |
| No                                | 466                   | 18 (3.9)   | 1.6-6.1  | 1    |           | 0.0451  |
| Yes                               | 1 214                 | 92 (7.6)   | 5.4-9.8  | 1.9  | 1.0-3.6   |         |
| Frequent work in rice fields      |                       |            |          |      |           |         |
| No                                | 911                   | 77 (8.5)   | 5.5-11.4 | 1    |           | 0.0021  |
| Yes                               | 769                   | 33 (4.3)   | 2.6-6.0  | 0.41 | 0.23-0.72 |         |
| Frequent activities in the forest |                       |            |          |      |           |         |
| No                                | 1 084                 | 58 (5.4)   | 3.4-7.3  | 1    |           | 0.1380  |
| Yes                               | 596                   | 52 (8.7)   | 5.4-12.0 | 1.49 | 0.88-2.53 |         |

|                                                                             |       |           |          |      |           |               |
|-----------------------------------------------------------------------------|-------|-----------|----------|------|-----------|---------------|
| <b>Frequent contacts to water bodies (fishing, swimming)</b>                |       |           |          |      |           |               |
| No                                                                          | 1 564 | 107 (6.8) | 4.8-8.9  | 1    |           |               |
| Yes                                                                         | 116   | 3 (2.6)   | 0.0-5.4  | 0.57 | 0.16-2.08 | 0.3933        |
| <b>Electricity in the house</b>                                             |       |           |          |      |           |               |
| No                                                                          | 1 114 | 75 (6.7)  | 4.2-9.2  | 1    |           |               |
| Yes                                                                         | 564   | 35 (6.2)  | 3.1-9.3  | 0.86 | 0.44-1.67 | 0.6596        |
| <b>Construction materials of the house</b>                                  |       |           |          |      |           |               |
| “Hard” materials<br>(bricks, wood, tin)                                     | 1 085 | 61 (5.6)  | 3.8-7.5  | 1    |           |               |
| Contains “soft” materials<br>(cob or vegetable house)                       | 593   | 49 (8.3)  | 4.9-11.6 | 1.58 | 0.91-2.76 | <b>0.1038</b> |
| <b>Running water in the house</b>                                           |       |           |          |      |           |               |
| No                                                                          | 1 593 | 108 (6.8) | 4.7-8.8  | 1    |           |               |
| Yes                                                                         | 87    | 2 (2.3)   | 0.0-5.1  | 0.28 | 0.05-1.64 | <b>0.1589</b> |
| <b>Smoke in the house when cooking</b>                                      |       |           |          |      |           |               |
| No                                                                          | 1 110 | 62 (5.5)  | 3.7-7.5  | 1    |           |               |
| Yes                                                                         | 568   | 48 (8.5)  | 5.1-11.8 | 1.70 | 1.02-2.83 | <b>0.0400</b> |
| <b>House targeted for Indoor Residual Spraying program (last 12 months)</b> |       |           |          |      |           |               |
| No                                                                          | 1 190 | 103 (8.7) | 6.1-11.3 | 1    |           |               |
| Yes                                                                         | 488   | 7 (1.4)   | 0.3-2.6  | 0.17 | 0.07-0.44 | <b>0.0003</b> |
| <b>Biological wastes next to the house</b>                                  |       |           |          |      |           |               |
| No                                                                          | 279   | 15 (5.4)  | 2.2-8.5  | 1    |           |               |
| Yes                                                                         | 1 399 | 95 (6.8)  | 4.6-9.0  | 1.02 | 0.49-2.09 | 0.9665        |
| <b>Non-biological wastes next to the house</b>                              |       |           |          |      |           |               |
| No                                                                          | 457   | 18 (3.9)  | 2.0-5.9  | 1    |           |               |
| Yes                                                                         | 1 221 | 92 (7.5)  | 5.0-10.0 | 1.56 | 0.82-2.94 | <b>0.1732</b> |
| <b>Cultures in the 10m around the house</b>                                 |       |           |          |      |           |               |
| No                                                                          | 736   | 31 (4.2)  | 2.7-5.7  | 1    |           |               |
| Yes                                                                         | 942   | 79 (8.4)  | 5.3-11.5 | 1.64 | 0.93-2.90 | <b>0.0900</b> |
| <b>Water in the 10m around the house</b>                                    |       |           |          |      |           |               |
| No                                                                          | 1 436 | 90 (6.3)  | 4.3-8.3  | 1    |           |               |
| Yes                                                                         | 242   | 20 (8.3)  | 2.6-13.9 | 1.65 | 0.80-3.41 | <b>0.1740</b> |

# Supplementary Table S2. Univariate analysis results for Chikungunya virus seropositivity.

Logistic regression analysis was run using xtlogit command and variables with p-value less than or equal to 0.2 (in bold) were selected for multivariate analysis. Variable “General environment” was used in multivariate models over “Distance to SHC” as it was deemed to be more representative of the direct environment. Due to possible confusion bias and incoherent results, “Frequent use of bed net” variable was excluded from multivariate models.

| Tested variable              | N tested <sup>1</sup> | Nb pos (%) | IC pos    | OR   | IC95% OR  | p-value |
|------------------------------|-----------------------|------------|-----------|------|-----------|---------|
| Age category                 |                       |            |           |      |           |         |
| 18-24 years                  | 388                   | 52 (13.4)  | 8.4-18.4  | 1    |           | 0.8143  |
| 25-34 years                  | 434                   | 56 (12.9)  | 7.6-18.2  | 1.08 | 0.56-2.08 |         |
| 35-44 years                  | 360                   | 56 (15.6)  | 9.9-21.2  | 1.30 | 0.66-2.54 |         |
| ≥45 years                    | 498                   | 66 (13.3)  | 8.3-18.2  | 0.96 | 0.51-1.82 |         |
| Sex                          |                       |            |           |      |           |         |
| Male                         | 829                   | 109 (13.1) | 8.7-17.6  | 1    |           | 0.9679  |
| Female                       | 851                   | 121 (14.2) | 9.8-18.6  | 0.99 | 0.63-1.57 |         |
| Distance from SHC            |                       |            |           |      |           |         |
| Close to SHC                 | 840                   | 124 (14.8) | 9.8-19.7  | 1    |           | 0.1767  |
| Distant from SHC             | 840                   | 106 (12.6) | 5.9-19.3  | 0.45 | 0.14-1.44 |         |
| General environment          |                       |            |           |      |           |         |
| Rural                        | 714                   | 104        |           | 1    |           | 0.0158  |
| Urban                        | 450                   | 21         |           | 2.69 | 0.78-9.32 |         |
| Peri-urban                   | 516                   | 105        |           | 0.39 | 0.09-1.62 |         |
| MFA Factor 1                 | 1 680                 |            |           | 0.92 | 0.55-1.54 | 0.7531  |
| MFA Factor 2                 | 1 680                 |            |           | 2.80 | 1.52-5.16 | 0.0009  |
| MFA Factor 3                 | 1 680                 |            |           | 0.51 | 0.26-1.01 | 0.0541  |
| MFA Factor 4                 | 1 680                 |            |           | 2.29 | 1.06-4.93 | 0.0343  |
| Education level              |                       |            |           |      |           |         |
| Never been to school         | 214                   | 26 (12.1)  | 4.2-20.1  | 1    |           | 0.8993  |
| Primary school level         | 626                   | 80 (12.8)  | 7.5-18.1  | 0.81 | 0.37-1.78 |         |
| Secondary school             | 500                   | 81 (16.2)  | 10.8-21.6 | 1.01 | 0.43-2.42 |         |
| High school                  | 260                   | 27 (10.4)  | 6.0-14.8  | 0.75 | 0.28-2.02 |         |
| University                   | 80                    | 16 (20.0)  | 10.7-29.3 | 0.96 | 0.29-3.16 |         |
| Outdoor profession           |                       |            |           |      |           |         |
| No                           | 756                   | 134 (17.7) | 12.6-22.8 | 1    |           | 0.0711  |
| Yes                          | 924                   | 96 (10.4)  | 5.5-15.3  | 0.55 | 0.28-1.05 |         |
| Smoker                       |                       |            |           |      |           |         |
| No                           | 1 336                 | 179 (13.4) | 9.2-17.6  | 1    |           | 0.1725  |
| Yes                          | 344                   | 51 (14.8)  | 9.2-20.5  | 1.48 | 0.84-2.61 |         |
| Frequent use of bed nets     |                       |            |           |      |           |         |
| No                           | 466                   | 34 (7.3)   | 3.8-10.8  | 1    |           | 0.0689  |
| Yes                          | 1 214                 | 196 (16.1) | 11.3-21.0 | 1.84 | 0.95-3.56 |         |
| Frequent work in rice fields |                       |            |           |      |           |         |
| No                           | 911                   | 162 (17.8) | 12.8-22.7 | 1    |           | 0.0312  |
| Yes                          | 769                   | 68 (8.8)   | 3.6-14.1  | 0.47 | 0.24-0.94 |         |

|                                                                           |       |            |           |      |           |               |  |
|---------------------------------------------------------------------------|-------|------------|-----------|------|-----------|---------------|--|
| <b>Frequent activities in the forest</b>                                  |       |            |           |      |           |               |  |
| No                                                                        | 1 084 | 133 (12.3) | 8.5-16.1  | 1    |           |               |  |
| Yes                                                                       | 596   | 97 (16.3)  | 8.9-23.7  | 1.80 | 0.96-3.40 | <b>0.0689</b> |  |
| <b>Frequent contacts to water bodies (fishing, swimming)</b>              |       |            |           |      |           |               |  |
| No                                                                        | 1 564 | 208 (13.3) | 9.5-17.1  | 1    |           |               |  |
| Yes                                                                       | 116   | 22 (19.0)  | 0.0-41.8  | 1.71 | 0.47-6.25 | 0.4162        |  |
| <b>Electricity in the house</b>                                           |       |            |           |      |           |               |  |
| No                                                                        | 1 114 | 122 (11.0) | 5.8-16.1  | 1    |           |               |  |
| Yes                                                                       | 564   | 108 (19.1) | 12.8-25.5 | 1.19 | 0.56-2.55 | 0.6452        |  |
| <b>Construction materials of the house</b>                                |       |            |           |      |           |               |  |
| “Hard” materials (bricks, wood, tin)                                      | 1 085 | 148 (13.6) | 9.4-17.9  | 1    |           |               |  |
| Contains “soft” materials (cob or vegetable house)                        | 593   | 82 (13.8)  | 7.9-19.7  | 0.61 | 0.32-1.18 | <b>0.1432</b> |  |
| <b>Running water in the house</b>                                         |       |            |           |      |           |               |  |
| No                                                                        | 1 593 | 218 (13.7) | 9.4-18.0  | 1    |           |               |  |
| Yes                                                                       | 87    | 12 (13.8)  | 3.5-24.1  | 1.31 | 0.35-4.83 | 0.6896        |  |
| <b>Smoke in the house when cooking</b>                                    |       |            |           |      |           |               |  |
| No                                                                        | 1 110 | 168 (15.1) | 10.4-19.8 | 1    |           |               |  |
| Yes                                                                       | 568   | 62 (10.9)  | 6.0-15.8  | 1.05 | 0.58-1.89 | 0.8818        |  |
| <b>House targeted for anti-mosquito spraying program (last 12 months)</b> |       |            |           |      |           |               |  |
| No                                                                        | 1 190 | 228 (19.2) | 13.7-24.6 | 1    |           |               |  |
| Yes                                                                       | 488   | 2 (0.4)    | 0.0-1.0   | 0.02 | 0.00-0.23 | <b>0.0026</b> |  |
| <b>Biological wastes next to the house</b>                                |       |            |           |      |           |               |  |
| No                                                                        | 279   | 34 (12.2)  | 5.6-18.8  | 1    |           |               |  |
| Yes                                                                       | 1 399 | 196 (14.0) | 9.4-18.7  | 1.29 | 0.63-2.65 | 0.4877        |  |
| <b>Non-biological wastes next to the house</b>                            |       |            |           |      |           |               |  |
| No                                                                        | 457   | 25 (5.5)   | 2.8-8.1   | 1    |           |               |  |
| Yes                                                                       | 1 221 | 205 (16.8) | 11.6-21.9 | 1.95 | 0.99-3.84 | <b>0.0530</b> |  |
| <b>Cultures in the 10m around the house</b>                               |       |            |           |      |           |               |  |
| No                                                                        | 736   | 65 (8.8)   | 5.1-12.6  | 1    |           |               |  |
| Yes                                                                       | 942   | 165 (17.5) | 11.4-23.6 | 1.07 | 0.59-1.96 | 0.8183        |  |
| <b>Water in the 10m around the house</b>                                  |       |            |           |      |           |               |  |
| No                                                                        | 1 436 | 182 (12.7) | 8.4-17.0  | 1    |           |               |  |
| Yes                                                                       | 242   | 48 (19.8)  | 10.8-28.9 | 1.58 | 0.75-3.33 | 0.2288        |  |

### Supplementary Table S3. Univariate analysis results for West Nile virus seropositivity.

Logistic regression analysis was run using xtlogit command and variables with p-value less than or equal to 0.2 (in bold) were selected for multivariate analysis. Variable “General environment” was used in multivariate models over “Distance to SHC” as it was deemed to be more representative of the direct environment. Due to possible confusion bias and incoherent results, “Frequent use of bed net” variable was excluded from multivariate models.

| Tested variable              | N tested <sup>1</sup> | Nb pos (%) | IC pos    | OR   | IC95% OR  | p-value |
|------------------------------|-----------------------|------------|-----------|------|-----------|---------|
| Age category                 |                       |            |           |      |           |         |
| 18-24 years                  | 388                   | 47 (12.1)  | 8.5-15.8  | 1    |           | 0.2498  |
| 25-34 years                  | 434                   | 48 (11.3)  | 8.1-14.5  | 0.83 | 0.51-1.35 |         |
| 35-44 years                  | 360                   | 51 (14.2)  | 10.1-18.2 | 1.33 | 0.81-2.17 |         |
| ≥45 years                    | 498                   | 67 (13.5)  | 9.8-17.1  | 1.17 | 0.74-1.86 |         |
| Sex                          |                       |            |           |      |           |         |
| Male                         | 829                   | 106 (12.8) | 10.0-15.6 | 1    |           | 0.7432  |
| Female                       | 851                   | 108 (12.7) | 9.8-15.5  | 1.06 | 0.76-1.46 |         |
| Distance from SHC            |                       |            |           |      |           |         |
| Close to SHC                 | 840                   | 71 (8.5)   | 6.3-10.6  | 1    |           | 0.0005  |
| Distant from SHC             | 840                   | 143 (17.0) | 12.8-21.2 | 2.48 | 1.49-4.13 |         |
| General environment          |                       |            |           |      |           |         |
| Rural                        | 714                   | 118 (16.5) | 11.9-21.1 | 1    |           | 0.0052  |
| Urban                        | 450                   | 59 (7.2)   | 4.5-9.9   | 0.37 | 0.20-0.68 |         |
| Peri-urban                   | 516                   | 37 (13.1)  | 9.0-17.2  | 0.79 | 0.44-1.42 |         |
| MFA Factor 1                 | 1 680                 |            |           | 1.07 | 0.84-1.36 | 0.5736  |
| MFA Factor 2                 | 1 680                 |            |           | 1.48 | 1.15-1.90 | 0.0020  |
| MFA Factor 3                 | 1 680                 |            |           | 1.62 | 1.20-2.17 | 0.0014  |
| MFA Factor 4                 | 1 680                 |            |           | 1.09 | 0.77-1.55 | 0.6127  |
| Education level              |                       |            |           |      |           |         |
| Never been to school         | 214                   | 40 (19.0)  | 13.1-25.0 | 1    |           | 0.0051  |
| Primary school level         | 626                   | 103 (16.5) | 12.4-20.6 | 0.96 | 0.60-1.54 |         |
| Secondary school             | 500                   | 48 (9.6)   | 6.7-12.5  | 0.56 | 0.33-0.96 |         |
| High school                  | 260                   | 22 (8.5)   | 4.9-12.0  | 0.52 | 0.27-1.00 |         |
| University                   | 80                    | 1 (1.3)    | 0.0-3.7   | 0.07 | 0.01-52.5 |         |
| Outdoor profession           |                       |            |           |      |           |         |
| No                           | 756                   | 69 (9.1)   | 6.4-11.8  | 1    |           | 0.0019  |
| Yes                          | 924                   | 145 (15.7) | 12.4-19.0 | 1.87 | 1.26-2.77 |         |
| Smoker                       |                       |            |           |      |           |         |
| No                           | 1 336                 | 171 (12.8) | 10.2-15.4 | 1    |           | 0.7214  |
| Yes                          | 344                   | 43 (12.5)  | 8.8-16.2  | 0.93 | 0.62-1.40 |         |
| Frequent use of bed nets     |                       |            |           |      |           |         |
| No                           | 466                   | 32 (6.9)   | 4.1-9.6   | 1    |           | 0.0085  |
| Yes                          | 1 214                 | 182 (15.0) | 12.0-18.0 | 1.86 | 1.17-2.96 |         |
| Frequent work in rice fields |                       |            |           |      |           |         |
| No                           | 911                   | 95 (10.4)  | 7.8-13.0  | 1    |           | 0.0268  |
| Yes                          | 769                   | 119 (15.5) | 11.8-19.2 | 1.57 | 1.05-2.34 |         |

|                                                                           |       |            |           |      |           |               |
|---------------------------------------------------------------------------|-------|------------|-----------|------|-----------|---------------|
| <b>Frequent activities in the forest</b>                                  |       |            |           |      |           |               |
| No                                                                        | 1 084 | 108 (10.0) | 7.8-12.1  | 1    |           |               |
| Yes                                                                       | 596   | 106 (17.8) | 13.4-22.5 | 1.64 | 1.13-2.37 | <b>0.0089</b> |
| <b>Frequent contacts to water bodies (fishing, swimming)</b>              |       |            |           |      |           |               |
| No                                                                        | 1 564 | 195 (12.5) | 10.0-14.9 | 1    |           |               |
| Yes                                                                       | 116   | 19 (16.4)  | 8.1-24.6  | 2.12 | 1.10-4.09 | <b>0.0242</b> |
| <b>Electricity in the house</b>                                           |       |            |           |      |           |               |
| No                                                                        | 1 114 | 180 (16.2) | 12.8-19.5 | 1    |           |               |
| Yes                                                                       | 564   | 34 (6.0)   | 3.7-8.3   | 0.33 | 0.20-0.55 | <b>0.0000</b> |
| <b>Construction materials of the house</b>                                |       |            |           |      |           |               |
| “Hard” materials (bricks, wood, tin)                                      | 1 085 | 97 (8.9)   | 6.9-10.9  | 1    |           |               |
| Contains “soft” materials (cob or vegetable house)                        | 593   | 117 (19.7) | 15.1-24.4 | 2.03 | 1.37-3.02 | <b>0.0005</b> |
| <b>Running water in the house</b>                                         |       |            |           |      |           |               |
| No                                                                        | 1 593 | 210 (13.2) | 10.6-15.7 | 1    |           |               |
| Yes                                                                       | 87    | 4 (4.6)    | 0.6-8.6   | 0.43 | 12.3-1.49 | <b>0.1822</b> |
| <b>Smoke in the house when cooking</b>                                    |       |            |           |      |           |               |
| No                                                                        | 1 110 | 140 (12.6) | 9.7-15.5  | 1    |           |               |
| Yes                                                                       | 568   | 74 (13.0)  | 9.5-16.5  | 0.99 | 0.61-1.62 | 0.4808        |
| <b>House targeted for anti-mosquito spraying program (last 12 months)</b> |       |            |           |      |           |               |
| No                                                                        | 1 190 | 156 (13.1) | 103-15.9  | 1    |           |               |
| Yes                                                                       | 488   | 58 (11.9)  | 7.7-16.1  | 0.73 | 0.44-1.21 | 0.2194        |
| <b>Biological wastes next to the house</b>                                |       |            |           |      |           |               |
| No                                                                        | 279   | 25 (9.0)   | 4.9-13.0  | 1    |           |               |
| Yes                                                                       | 1 399 | 189 (13.5) | 10.8-16.2 | 1.29 | 0.74-2.24 | 0.3634        |
| <b>Non-biological wastes next to the house</b>                            |       |            |           |      |           |               |
| No                                                                        | 457   | 52 (11.3)  | 7.4-15.3  | 1    |           |               |
| Yes                                                                       | 1 221 | 162 (13.3) | 10.5-16.1 | 0.92 | 0.60-1.42 | 0.7118        |
| <b>Cultures in the 10m around the house</b>                               |       |            |           |      |           |               |
| No                                                                        | 736   | 62 (8.4)   | 6.1-10.8  | 1    |           |               |
| Yes                                                                       | 942   | 152 (16.1) | 12.6-19.7 | 1.62 | 1.06-2.46 | <b>0.0252</b> |
| <b>Water in the 10m around the house</b>                                  |       |            |           |      |           |               |
| No                                                                        | 1 436 | 187 (13.0) | 10.4-15.6 | 1    |           |               |
| Yes                                                                       | 242   | 27 (11.1)  | 6.5-15.9  | 1.00 | 0.55-1.82 | 0.9873        |
